# Supplementary material for: Isolation, Characterization, Genome Analysis and Host Resistance Development of Two Novel Lastavirus Phages Active against Pandrug-Resistant Klebsiella pneumoniae
Source: MDPI journal article supplement (doi:10.3390/v15030628), 2023-02-25
Supplement: s1 [file s1]

## Supplementary material

### 1. Supplementary tables

**Table S1:** Rho-factor-independent terminators in genomes of LASTA/SJM3

| Sr. No | Position of transcription terminator | Strand | Sequence                                                 | e-value |
|--------|--------------------------------------|--------|----------------------------------------------------------|---------|
| 1      | 52                                   | -      | ACCAGCCACTAG <b>CCCCCTGGTTTCAGCCGGGGG</b> CTTTTTATTTTTTG | -16.80  |
| 2      | 3693                                 | +      | TTCTGCTCTT <b>GCGTTGCCGGGCCAGCAACG</b> TTTTCGGCCTTC      | -7.10   |
| 3      | 5787                                 | +      | TCTGACCAGTAC <b>CAGGGAATTATCCTTG</b> TTTTCGCTGTCC        | -6.30   |
| 4      | 12183                                | -      | TATGGTTTCT <b>CCCGCGTTGGTACTGGCGCTGG</b> TTTTGCTACATC    | -11.50  |
| 5      | 13550                                | +      | GGGGATCATT <b>ACCGGTTGCCGG</b> TTTTGGTGTCGT              | -5.60   |
| 6      | 16509                                | -      | GAAAATTGCGCG <b>CTGTACCCCTCTGGGACGGC</b> TTTTCAGAGTGT    | -7.90   |
| 7      | 16691                                | -      | TCAGTAAACT <b>TGGTAATGTCGTGCGTTGCC</b> cTTTTGTCTATCA     | -8.10   |
| 8      | 21912                                | -      | GTTATGATTA <b>AGCCCCGAAAGGGG</b> CTTTTTCGTATGC           | -11.00  |
| 9      | 23680                                | -      | ATAAAAACAC <b>GGTTGGACGGCATGTT</b> CAGCTTTTTCGCTGTGG     | -6.70   |
| 10     | 26320                                | -      | CAGCATGGGAG <b>GTTGGCGGCAGACAAGCCAGC</b> TTTTCAACTTTT    | -8.70   |
| 11     | 30200                                | +      | TGACCGTCGT <b>CGGCAGCATCTTCAGCGCTGTC</b> TTCGTCTTCGCC    | -8.10   |
| 12     | 30707                                | -      | AATCACCAGC <b>AGGGGCGAAAGCCCC</b> TGTCTTTTCATC           | -11.00  |
| 13     | 32413                                | +      | GCAAACACTCAT <b>GTTCATGCCAATGGCG</b> TTTTTGCTTGA         | -4.60   |
| 14     | 33139                                | +      | CCCGCGCTCT <b>TGTTCAGCTCGCGAGCTGGGC</b> ATTATATTCGCGG    | -9.50   |
| 15     | 33657                                | +      | TCCTGCATAG <b>CTGCTGTTCGGCAGCGG</b> cTTGCTGTTGCTG        | -9.80   |
| 16     | 36968                                | +      | CACGGTGTA <b>ATGCGCTTCTCCTTGCC</b> ATTTTGACCATCT         | -8.00   |
| 17     | 38042                                | -      | CACATGCCTC <b>ACCGCATTATAGCGG</b> TTTTCTGTGCAA           | -6.30   |
| 18     | 40700                                | -      | GGTGGTTTTA <b>ATGTTCGCCCTGTTCTGGCGGCG</b> TTTGTTGTAGCT   | -9.90   |
| 19     | 40878                                | -      | TAAAACGAAAC <b>AGGAGCGCCTATGAGCGCTCCT</b> TTCTTTTGGTGTC  | -14.80  |
| 20     | 40880                                | +      | CACCAAAAGAA <b>AGGAGCGCTCATAGGCGCTCCT</b> gTTTCGTTTTATGG | -15.30  |
| 21     | 42085                                | -      | TGCGGGAAAT <b>CCCGCCCGGCCGCTGGTGG</b> TTTTAACGTGCC       | -5.90   |

|    |       |   |                                                       |        |
|----|-------|---|-------------------------------------------------------|--------|
| 22 | 43130 | + | CCGCTCTACGGCGGCGATCCATTGCTGTTTTGATTATTC               | -5.20  |
| 23 | 47378 | + | CGGGTAAGACTCGGAAGAGCGAAATGGCTTTCGATTTTGCGATATG        | -5.70  |
| 24 | 50336 | - | TGAGCATTGGAGGCCAACCAAGGCCTTTTCTCGTCG                  | -6.80  |
| 25 | 53425 | - | TAACGCGAGGCTGGCGAGCGCCGCCGTTTTGCTGGTG                 | -6.60  |
| 26 | 55853 | + | AGTCGGATGGTGGGGAAGTTCACGCTTCCCCcTTTTCAATCTGT          | -13.10 |
| 27 | 56531 | - | GCCTTATCCTTGTACCCGACGGTGGCTCTGTCTTCGAC                | -8.70  |
| 28 | 59000 | - | CGATTTGGCGACGCGCTTCAGCGCGTTTTTATCTGT                  | -8.10  |
| 29 | 59527 | + | CATGGCTTTTTCTCGGTTGGTTGTCGAGTTATTTCTCA                | -6.30  |
| 30 | 59620 | - | GATAAATGTTCTGACCGCCAGGGTCGcTTTTCAACAAG                | -6.20  |
| 31 | 60485 | - | TCGACTTCCATGCCCCGCGTACCAGCGGGCTTTTTTTTGTTT            | -12.00 |
| 32 | 61208 | + | ATCTGCGGCCTTCGTAGCTGCTGCTGCGGccTTTTGCGCTGCT           | -9.60  |
| 33 | 61368 | - | GTTCAGCATTGCCGGTGCTTTCGCGCGTTTTGCCGCGAG               | -9.50  |
| 34 | 61726 | - | TGCAGCCATTACCGCTTTTATCGGCGG <sub>a</sub> TTTTTTTGGCTC | -7.00  |
| 35 | 62196 | + | ATCGATGCCTTTGGCGATGAGCCGTTTTTTGAAGAT                  | -4.80  |

**Table S2:** Putative conserved regulatory elements of LASTA/SJM3 genome as predicted by PHIRE

| Sr. No | End Position | Start position | Sequence                        |
|--------|--------------|----------------|---------------------------------|
| 1      | 14595        | 14576          | CTGCTGGTCCTGCTGCTGCT            |
| 2      | 08714        | 08695          | CTACTGTTCCCTGCGGCTGGT           |
| 3      | 13005        | 12986          | TGGCTGGTCCTGCTGCTGGG            |
| 4      | 14598        | 14579          | CTGGTCCTGCTGCTGCTGCT            |
| 5      | 32834        | 32815          | CTGCTGCTGCTTCGGCTGCT            |
| 6      | 32837        | 32818          | CTGCTGCTTCGGCTGCTGCT            |
| 7      | 32852        | 32833          | CTGCTGGGCCCGCCTGCTCCT           |
| 8      | 33332        | 33313          | CTGCTGGGCTTTCTGCTGCT            |
| 9      | 33344        | 33325          | CTGCTGCTCCTGTTGGTCCT            |
| 10     | 33353        | 33334          | CTGTTGGTCCTGCTGCTCTT            |
| 11     | 33362        | 33343          | CTGCTGCTCTTCCTGCTTCT            |
| 12     | 33365        | 33346          | CTGCTCTTCCTGCTTCTGTT            |
| 13     | 33624        | 33605          | CTGCTGTTCCCTGCTGTTGCT           |
| 14     | 33660        | 33641          | CTGCTGGGCCTGTTGCTCCT            |
| 15     | 58923        | 58942          | CTGGTGGTGTGTTGCTGGT (consensus) |
